# Supplementary material for: Finger Kinematics during Human Hand Grip and Release
Source: MDPI journal article supplement (doi:10.3390/biomimetics8020244), 2023-06-08
Supplement: s1 [file s1]

### Supplementary Materials:

The angular values of finger joints at maximum flexion and extension for all the participants are shown in Table S1 and Table S2, which are used to calculate the dynamic ROMs. The peak velocities of finger joints during flexion and extension for all the participants are shown in Table S3 and Table S4. The detailed information on feature points of joints at different motion phases is shown in Table S5, Table S6, Table S7, Table S8, Table S9 and Table S10, which is used to determine the joint sequence. The detailed information on feature points of fingers at different motion phases is shown in Table S11 and Table S12, which is used to determine the finger sequence.

**Table S1.** The angle of finger joints at maximum flexion during grasping and releasing for 22 subjects.

| Angle<br>(°) | Thumb |       |       | Index  |       | Middle |        |       |       | Ring   |       |       | Little |       |
|--------------|-------|-------|-------|--------|-------|--------|--------|-------|-------|--------|-------|-------|--------|-------|
|              | IP    | MCP   | DIP   | PIP    | MCP   | DIP    | PIP    | MCP   | DIP   | PIP    | MCP   | DIP   | PIP    | MCP   |
| S1           | 75.33 | 39.92 | 61.37 | 101.43 | 86.76 | 70.85  | 97.65  | 82.24 | 76.54 | 98.65  | 80.87 | 70.12 | 86.66  | 77.27 |
| S2           | 50.18 | 35.25 | 66.13 | 92.48  | 74.36 | 75.32  | 94.60  | 78.39 | 72.08 | 92.00  | 85.23 | 76.27 | 92.55  | 83.14 |
| S3           | 69.31 | 57.28 | 62.18 | 96.89  | 85.11 | 78.49  | 89.28  | 84.11 | 85.45 | 92.96  | 87.61 | 69.36 | 91.39  | 87.49 |
| S4           | 62.50 | 46.89 | 70.73 | 102.7  | 88.74 | 67.61  | 96.64  | 84.03 | 74.03 | 102.30 | 96.48 | 74.98 | 90.55  | 87.53 |
| S5           | 67.30 | 42.51 | 67.63 | 99.25  | 93.00 | 81.14  | 104.7  | 91.75 | 78.12 | 100.86 | 90.39 | 74.86 | 93.49  | 80.51 |
| S6           | 64.71 | 49.50 | 66.05 | 87.85  | 72.60 | 76.32  | 97.42  | 83.46 | 73.61 | 96.35  | 82.10 | 64.51 | 86.71  | 80.19 |
| S7           | 56.06 | 34.27 | 60.88 | 93.17  | 79.93 | 72.48  | 93.15  | 86.65 | 68.89 | 103.93 | 82.77 | 75.19 | 90.57  | 82.06 |
| S8           | 57.71 | 35.46 | 72.89 | 92.10  | 84.95 | 69.71  | 91.77  | 89.44 | 77.96 | 96.46  | 93.81 | 75.38 | 91.69  | 82.60 |
| S9           | 78.30 | 47.18 | 67.06 | 102.3  | 92.45 | 80.95  | 94.73  | 85.49 | 70.54 | 90.07  | 80.79 | 69.35 | 86.06  | 83.45 |
| S10          | 64.95 | 40.00 | 65.36 | 92.30  | 86.74 | 73.39  | 87.63  | 83.19 | 71.14 | 88.00  | 82.49 | 66.79 | 85.44  | 80.55 |
| S11          | 65.09 | 47.19 | 74.51 | 96.11  | 86.38 | 75.35  | 96.09  | 88.38 | 75.53 | 95.30  | 87.40 | 73.06 | 87.85  | 82.62 |
| S12          | 72.86 | 51.88 | 54.03 | 93.53  | 83.42 | 79.94  | 93.51  | 90.21 | 70.49 | 98.83  | 90.48 | 75.67 | 95.59  | 85.76 |
| S13          | 59.14 | 36.38 | 65.18 | 98.79  | 87.79 | 80.79  | 103.92 | 84.16 | 72.25 | 97.83  | 80.63 | 75.52 | 95.31  | 82.27 |
| S14          | 69.52 | 44.84 | 69.47 | 100.98 | 82.47 | 70.23  | 95.23  | 88.13 | 62.33 | 98.99  | 84.31 | 64.49 | 84.36  | 78.19 |
| S15          | 70.60 | 38.40 | 64.87 | 99.05  | 83.79 | 68.67  | 96.35  | 89.86 | 80.47 | 92.06  | 85.48 | 73.02 | 90.72  | 79.81 |
| S16          | 71.59 | 43.16 | 77.27 | 102.53 | 86.51 | 72.89  | 90.46  | 87.69 | 67.09 | 95.96  | 83.89 | 68.47 | 92.65  | 83.44 |
| S17          | 57.41 | 47.12 | 69.24 | 99.43  | 85.69 | 68.10  | 92.22  | 86.44 | 75.03 | 92.39  | 90.69 | 70.36 | 96.61  | 88.38 |
| S18          | 78.72 | 55.57 | 70.62 | 99.97  | 83.34 | 80.79  | 96.39  | 82.37 | 74.52 | 101.54 | 82.82 | 74.60 | 90.28  | 83.24 |
| S19          | 73.04 | 57.32 | 66.54 | 96.44  | 85.97 | 75.07  | 97.53  | 84.62 | 77.27 | 95.68  | 81.00 | 77.86 | 93.10  | 83.88 |
| S20          | 71.28 | 46.72 | 65.46 | 95.67  | 82.48 | 70.36  | 97.48  | 82.81 | 66.09 | 91.28  | 83.69 | 65.09 | 90.22  | 85.23 |
| S21          | 71.75 | 47.54 | 66.43 | 97.07  | 80.36 | 73.91  | 91.54  | 80.25 | 72.64 | 94.07  | 84.27 | 70.98 | 89.75  | 79.63 |
| S22          | 74.02 | 41.14 | 73.55 | 100.12 | 87.77 | 71.91  | 91.04  | 82.45 | 84.78 | 92.04  | 86.51 | 76.34 | 88.80  | 85.96 |
| Mean         | 67.33 | 44.80 | 67.16 | 97.28  | 84.57 | 74.28  | 94.97  | 85.28 | 73.95 | 95.80  | 85.62 | 71.92 | 90.47  | 82.87 |
| SD           | 7.61  | 6.91  | 5.13  | 4.03   | 4.83  | 4.49   | 4.17   | 3.44  | 5.59  | 4.25   | 4.40  | 4.17  | 3.35   | 3.02  |

**Table S2.** The angle of finger joints at maximum extension during grasping and releasing for 22 subjects.

| Angle<br>(°) | Thumb |       |       | Index |       |       | Middle |       |       | Ring  |       |       | Little |       |  |
|--------------|-------|-------|-------|-------|-------|-------|--------|-------|-------|-------|-------|-------|--------|-------|--|
|              | IP    | MCP   | DIP   | PIP   | MCP   | DIP   | PIP    | MCP   | DIP   | PIP   | MCP   | DIP   | PIP    | MCP   |  |
| S1           | 11.16 | 11.15 | 10.87 | 27.54 | 6.77  | 1.22  | 25.76  | 5.78  | 5.00  | 21.66 | 6.78  | 6.88  | 19.55  | 3.65  |  |
| S2           | 10.72 | 18.26 | 10.49 | 33.20 | 16.28 | 9.01  | 29.80  | 11.74 | 8.63  | 29.22 | 12.87 | 7.96  | 26.99  | 11.1  |  |
| S3           | 14.11 | 19.87 | 5.94  | 6.29  | 3.61  | 2.61  | 12.71  | 3.87  | 4.51  | 3.65  | 3.99  | 3.30  | 8.30   | 7.95  |  |
| S4           | 15.36 | 19.55 | 25.12 | 42.66 | 21.54 | 20.01 | 38.97  | 17.77 | 16.72 | 35.50 | 30.44 | 14.87 | 28.15  | 28.03 |  |
| S5           | 20.64 | 13.77 | 1.02  | 27.82 | 13.25 | 6.25  | 29.78  | 13.31 | 6.68  | 25.29 | 6.94  | 6.4   | 22.83  | 1.69  |  |
| S6           | 20.93 | 19.18 | 3.25  | 15.95 | 5.97  | 4.96  | 14.71  | 10.74 | 3.46  | 17.09 | 13.38 | 6.98  | 11.45  | 9.07  |  |
| S7           | 8.54  | 10.56 | 4.55  | 14.92 | 5.14  | 5.56  | 10.55  | 5.04  | 4.21  | 8.61  | 4.52  | 1.04  | 13.31  | 6.03  |  |
| S8           | 17.28 | 9.78  | 2.54  | 10.86 | 7.93  | 4.07  | 9.92   | 4.55  | 4.71  | 9.11  | 8.02  | 4.93  | 6.50   | 3.60  |  |
| S9           | 10.18 | 22.10 | 2.83  | 8.40  | 6.35  | 7.18  | 11.58  | 8.73  | 4.17  | 11.18 | 7.73  | 1.65  | 13.68  | 10.11 |  |
| S10          | 19.01 | 24.89 | 2.33  | 15.38 | 7.35  | 3.37  | 18.36  | 9.51  | 8.45  | 17.11 | 13.48 | 9.82  | 16.2   | 4.37  |  |
| S11          | 15.58 | 18.26 | 2.41  | 13.53 | 8.32  | 7.13  | 11.92  | 9.73  | 7.15  | 11.17 | 8.32  | 13.06 | 12.91  | 3.94  |  |
| S12          | 9.41  | 23.97 | 6.23  | 13.07 | 5.79  | 5.29  | 7.28   | 6.62  | 5.81  | 8.72  | 7.24  | 1.84  | 7.75   | 8.81  |  |
| S13          | 18.14 | 19.69 | 0.94  | 15.13 | 8.84  | 2.72  | 10.62  | 11.82 | 6.01  | 12.85 | 8.06  | 1.91  | 11.73  | 8.78  |  |
| S14          | 13.74 | 20.19 | 4.02  | 16.97 | 7.78  | 5.13  | 8.25   | 8.86  | 2.82  | 8.53  | 5.16  | 7.51  | 11.19  | 9.83  |  |
| S15          | 14.02 | 18.90 | 0.77  | 17.85 | 4.27  | 7.08  | 19.60  | 6.09  | 6.98  | 15.18 | 6.32  | 1.55  | 19.53  | 3.90  |  |
| S16          | 19.7  | 19.52 | 4.53  | 17.42 | 12.73 | 6.34  | 18.36  | 10.89 | 5.82  | 17.85 | 14.71 | 1.27  | 21.00  | 10.28 |  |
| S17          | 14.32 | 23.27 | 7.14  | 18.07 | 14.37 | 2.91  | 24.37  | 15.06 | 3.95  | 21.41 | 14.62 | 4.75  | 25.63  | 10.53 |  |
| S18          | 15.45 | 25.63 | 2.79  | 15.47 | 8.68  | 4.11  | 12.83  | 6.19  | 5.77  | 12.27 | 6.38  | 4.44  | 14.23  | 4.34  |  |
| S19          | 8.47  | 13.66 | 3.13  | 16.94 | 10.43 | 2.69  | 18.48  | 6.41  | 4.01  | 17.12 | 11.71 | 6.97  | 10.56  | 5.52  |  |
| S20          | 19.17 | 26.44 | 3.21  | 12.50 | 5.98  | 3.67  | 13.32  | 5.51  | 2.82  | 7.39  | 7.66  | 1.96  | 10.31  | 7.16  |  |
| S21          | 15.62 | 26.66 | 1.88  | 15.31 | 10.56 | 1.84  | 10.29  | 3.77  | 1.21  | 12.94 | 7.72  | 1.35  | 14.51  | 5.55  |  |
| S22          | 19.08 | 12.84 | 1.87  | 12.42 | 4.68  | 1.07  | 10.57  | 5.28  | 3.58  | 9.93  | 5.91  | 2.04  | 12.25  | 6.66  |  |
| Mean         | 15.03 | 19.01 | 4.90  | 17.62 | 8.94  | 5.19  | 16.73  | 8.51  | 5.57  | 15.17 | 9.63  | 5.11  | 15.39  | 7.77  |  |
| SD           | 3.97  | 5.17  | 5.29  | 8.32  | 4.40  | 3.93  | 8.31   | 3.81  | 3.10  | 7.71  | 5.69  | 3.91  | 6.30   | 5.29  |  |

**Table S3.** Peak velocity of finger joints during flexion for 22 subjects.

| Velocity<br>(°/s) | Thumb |     |      | Index |      |      | Middle |      |      | Ring |      |      | Little |      |  |
|-------------------|-------|-----|------|-------|------|------|--------|------|------|------|------|------|--------|------|--|
|                   | IP    | MCP | DIP  | PIP   | MCP  | DIP  | PIP    | MCP  | DIP  | PIP  | MCP  | DIP  | PIP    | MCP  |  |
| S1                | 1051  | 662 | 994  | 1393  | 1954 | 1338 | 1724   | 1810 | 1323 | 1881 | 1952 | 1147 | 1563   | 1877 |  |
| S2                | 818   | 271 | 801  | 1174  | 974  | 985  | 1385   | 1156 | 913  | 1347 | 1353 | 1087 | 1471   | 1293 |  |
| S3                | 755   | 637 | 874  | 1494  | 1502 | 1361 | 1512   | 1494 | 1289 | 1842 | 1592 | 1389 | 1933   | 1787 |  |
| S4                | 949   | 490 | 1119 | 1200  | 1245 | 1173 | 1215   | 1080 | 1392 | 1415 | 1311 | 1286 | 1297   | 1189 |  |
| S5                | 1009  | 453 | 982  | 1254  | 1476 | 1221 | 1707   | 1495 | 1200 | 1871 | 1675 | 1352 | 1897   | 1905 |  |
| S6                | 493   | 403 | 1198 | 1216  | 995  | 1014 | 1535   | 956  | 1206 | 1654 | 1000 | 1322 | 1449   | 1153 |  |
| S7                | 860   | 545 | 1010 | 1338  | 1563 | 1323 | 1588   | 1603 | 986  | 1891 | 1528 | 1171 | 1464   | 1227 |  |
| S8                | 490   | 290 | 809  | 1173  | 956  | 974  | 1126   | 1053 | 1115 | 1220 | 1131 | 1129 | 1206   | 1181 |  |
| S9                | 927   | 205 | 844  | 1443  | 1610 | 973  | 1549   | 1157 | 922  | 1399 | 1344 | 1087 | 1276   | 1420 |  |
| S10               | 636   | 399 | 1158 | 1505  | 1456 | 1314 | 1363   | 1578 | 1194 | 1314 | 1737 | 1197 | 1468   | 1890 |  |
| S11               | 838   | 525 | 1396 | 1566  | 1811 | 1659 | 1938   | 1724 | 1418 | 1596 | 1811 | 1437 | 1497   | 1675 |  |
| S12               | 893   | 266 | 939  | 1487  | 923  | 1159 | 1813   | 1221 | 1037 | 1779 | 1373 | 950  | 1589   | 802  |  |
| S13               | 395   | 141 | 711  | 915   | 824  | 916  | 1062   | 775  | 864  | 1036 | 943  | 876  | 830    | 760  |  |
| S14               | 747   | 301 | 862  | 1448  | 974  | 1022 | 1709   | 1089 | 877  | 1839 | 1125 | 1090 | 1373   | 973  |  |
| S15               | 703   | 214 | 694  | 1156  | 1216 | 838  | 1147   | 1347 | 903  | 1467 | 1108 | 958  | 1449   | 1532 |  |
| S16               | 633   | 329 | 1551 | 1073  | 1047 | 1059 | 895    | 1168 | 953  | 828  | 951  | 937  | 859    | 1125 |  |
| S17               | 750   | 431 | 1314 | 1670  | 1293 | 1396 | 1475   | 1268 | 1669 | 1636 | 1520 | 1422 | 1469   | 1360 |  |
| S18               | 1034  | 622 | 1460 | 1580  | 1201 | 1493 | 1671   | 1205 | 1782 | 1846 | 1281 | 1625 | 1762   | 1528 |  |
| S19               | 644   | 352 | 707  | 1149  | 857  | 852  | 1246   | 813  | 780  | 1289 | 724  | 898  | 1351   | 908  |  |
| S20               | 419   | 200 | 666  | 693   | 719  | 643  | 864    | 719  | 713  | 773  | 641  | 616  | 748    | 676  |  |
| S21               | 621   | 221 | 928  | 1389  | 973  | 1020 | 1424   | 1152 | 1119 | 1427 | 1282 | 1389 | 1361   | 1053 |  |
| S22               | 565   | 279 | 1176 | 1250  | 1240 | 1203 | 1117   | 1016 | 1306 | 1216 | 1303 | 1251 | 1160   | 1238 |  |
| Mean              | 738   | 375 | 1009 | 1298  | 1219 | 1134 | 1412   | 1222 | 1135 | 1480 | 1304 | 1164 | 1385   | 1298 |  |
| SD                | 196   | 154 | 258  | 232   | 333  | 241  | 297    | 297  | 277  | 337  | 339  | 234  | 302    | 371  |  |

**Table S4.** Peak velocity of finger joints during extension for 22 subjects.

| Velocity<br>(°/s) | Thumb |     | Index |      |      | Middle |      |      | Ring |      |      | Little |      |      |
|-------------------|-------|-----|-------|------|------|--------|------|------|------|------|------|--------|------|------|
|                   | IP    | MCP | DIP   | PIP  | MCP  | DIP    | PIP  | MCP  | DIP  | PIP  | MCP  | DIP    | PIP  | MCP  |
| S1                | 949   | 386 | 777   | 1498 | 1743 | 1085   | 1671 | 1548 | 1118 | 1852 | 1496 | 1106   | 1561 | 1712 |
| S2                | 715   | 263 | 961   | 1300 | 1061 | 1168   | 1251 | 1432 | 950  | 1031 | 1484 | 1089   | 1112 | 1325 |
| S3                | 1026  | 502 | 1093  | 1516 | 1336 | 1432   | 1531 | 1644 | 1408 | 1720 | 1440 | 1424   | 1743 | 1224 |
| S4                | 962   | 610 | 1199  | 1448 | 1508 | 1121   | 1207 | 1463 | 1527 | 1601 | 1479 | 1478   | 1399 | 1636 |
| S5                | 935   | 331 | 1242  | 1237 | 1428 | 1046   | 1030 | 1469 | 1200 | 1284 | 1449 | 829    | 1187 | 1492 |
| S6                | 550   | 417 | 1105  | 1170 | 1168 | 1129   | 1585 | 1178 | 1464 | 1408 | 1017 | 1242   | 1456 | 1484 |
| S7                | 848   | 367 | 1066  | 1221 | 1226 | 1214   | 1433 | 1232 | 1167 | 1387 | 1233 | 1469   | 1043 | 1300 |
| S8                | 408   | 257 | 1187  | 994  | 1098 | 857    | 1235 | 1304 | 1208 | 1372 | 1091 | 1039   | 1087 | 1400 |
| S9                | 827   | 254 | 777   | 1505 | 1239 | 963    | 1548 | 1039 | 989  | 1525 | 980  | 894    | 1382 | 1429 |
| S10               | 766   | 275 | 1038  | 1062 | 1268 | 1109   | 1125 | 1222 | 1252 | 1142 | 1051 | 910    | 1184 | 1499 |
| S11               | 656   | 314 | 983   | 1145 | 1337 | 977    | 1010 | 1295 | 842  | 1409 | 1213 | 1100   | 1435 | 1304 |
| S12               | 927   | 256 | 916   | 1220 | 1130 | 1378   | 1352 | 1289 | 1218 | 1838 | 1287 | 1341   | 2189 | 1315 |
| S13               | 300   | 211 | 926   | 837  | 766  | 892    | 1025 | 709  | 858  | 990  | 950  | 1177   | 992  | 956  |
| S14               | 764   | 272 | 1361  | 1501 | 1076 | 895    | 1610 | 1073 | 818  | 1326 | 1061 | 959    | 1196 | 1178 |
| S15               | 706   | 312 | 813   | 1662 | 1605 | 1119   | 1645 | 1629 | 1019 | 1615 | 1409 | 1248   | 1843 | 1646 |
| S16               | 582   | 261 | 1416  | 987  | 985  | 806    | 880  | 1223 | 907  | 823  | 825  | 1038   | 790  | 1038 |
| S17               | 808   | 410 | 1163  | 1594 | 1652 | 1407   | 1365 | 1675 | 1624 | 1517 | 1563 | 1485   | 1450 | 1541 |
| S18               | 697   | 326 | 1329  | 1400 | 1300 | 1409   | 1656 | 1255 | 1578 | 1914 | 1107 | 1615   | 1669 | 1342 |
| S19               | 820   | 509 | 1364  | 1387 | 1005 | 1009   | 1336 | 1090 | 957  | 1556 | 778  | 1347   | 1414 | 1080 |
| S20               | 524   | 203 | 978   | 868  | 815  | 1065   | 870  | 809  | 849  | 993  | 1008 | 964    | 808  | 1033 |
| S21               | 773   | 264 | 1059  | 1707 | 991  | 1017   | 1463 | 1200 | 1064 | 1701 | 1165 | 1395   | 1726 | 1376 |
| S22               | 1008  | 381 | 1367  | 1639 | 1630 | 1358   | 1782 | 1241 | 1546 | 1681 | 1412 | 1415   | 1550 | 1536 |
| Mean              | 752   | 336 | 1096  | 1314 | 1244 | 1112   | 1346 | 1274 | 1162 | 1440 | 1204 | 1208   | 1373 | 1357 |
| SD                | 192   | 104 | 197   | 259  | 269  | 188    | 272  | 248  | 264  | 303  | 235  | 228    | 344  | 209  |

**Table S5.** The initiation point of flexion of finger joints after time normalization (0~50% for flexion) for 22 subjects.

| Position<br>(%) | Thumb |      | Index |      |      | Middle |      |      | Ring |      |      | Little |      |      |
|-----------------|-------|------|-------|------|------|--------|------|------|------|------|------|--------|------|------|
|                 | IP    | MCP  | DIP   | PIP  | MCP  | DIP    | PIP  | MCP  | DIP  | PIP  | MCP  | DIP    | PIP  | MCP  |
| S1              | 9     | 5    | 9     | 2    | 4    | 6      | 2    | 7    | 8    | 1    | 7    | 9      | 3    | 5    |
| S2              | 7     | 2    | 3     | 1    | 4    | 6      | 2    | 3    | 6    | 3    | 4    | 7      | 4    | 5    |
| S3              | 5     | 7    | 7     | 4    | 8    | 12     | 5    | 6    | 5    | 4    | 9    | 11     | 5    | 6    |
| S4              | 6     | 3    | 6     | 4    | 3    | 5      | 6    | 3    | 4    | 5    | 5    | 6      | 3    | 5    |
| S5              | 3     | 6    | 9     | 5    | 6    | 7      | 4    | 5    | 6    | 4    | 5    | 10     | 4    | 7    |
| S6              | 3     | 4    | 10    | 9    | 4    | 12     | 9    | 4    | 9    | 5    | 4    | 15     | 6    | 7    |
| S7              | 4     | 2    | 10    | 4    | 5    | 8      | 6    | 6    | 5    | 6    | 5    | 7      | 6    | 5    |
| S8              | 3     | 1    | 8     | 5    | 3    | 9      | 8    | 4    | 4    | 4    | 3    | 5      | 4    | 7    |
| S9              | 5     | 5    | 12    | 5    | 6    | 8      | 6    | 9    | 8    | 6    | 7    | 11     | 6    | 7    |
| S10             | 3     | 6    | 22    | 18   | 8    | 14     | 6    | 7    | 5    | 6    | 11   | 13     | 8    | 14   |
| S11             | 4     | 12   | 12    | 5    | 6    | 9      | 5    | 9    | 8    | 6    | 7    | 10     | 6    | 5    |
| S12             | 6     | 5    | 14    | 10   | 4    | 15     | 7    | 5    | 10   | 8    | 7    | 19     | 8    | 5    |
| S13             | 10    | 1    | 11    | 5    | 4    | 7      | 4    | 6    | 5    | 4    | 8    | 11     | 3    | 4    |
| S14             | 5     | 4    | 13    | 8    | 4    | 7      | 8    | 5    | 6    | 8    | 4    | 13     | 12   | 6    |
| S15             | 4     | 8    | 9     | 3    | 8    | 11     | 6    | 5    | 13   | 6    | 5    | 12     | 6    | 10   |
| S16             | 1     | 5    | 13    | 9    | 4    | 4      | 8    | 5    | 6    | 5    | 4    | 13     | 5    | 6    |
| S17             | 8     | 5    | 6     | 7    | 2    | 6      | 6    | 2    | 6    | 5    | 3    | 8      | 5    | 4    |
| S18             | 3     | 7    | 9     | 7    | 6    | 12     | 5    | 8    | 7    | 6    | 8    | 12     | 7    | 8    |
| S19             | 3     | 4    | 12    | 6    | 4    | 9      | 7    | 4    | 8    | 7    | 4    | 14     | 4    | 6    |
| S20             | 2     | 3    | 18    | 6    | 7    | 8      | 4    | 6    | 8    | 6    | 8    | 18     | 6    | 5    |
| S21             | 3     | 2    | 14    | 4    | 8    | 9      | 4    | 7    | 9    | 5    | 13   | 16     | 6    | 6    |
| S22             | 3     | 2    | 9     | 6    | 5    | 11     | 3    | 10   | 10   | 4    | 9    | 8      | 5    | 7    |
| Mean            | 4.55  | 4.50 | 10.73 | 6.05 | 5.14 | 8.86   | 5.50 | 5.73 | 7.09 | 5.18 | 6.36 | 11.27  | 5.55 | 6.36 |
| SD              | 2.30  | 2.60 | 4.13  | 3.48 | 1.81 | 2.92   | 1.92 | 2.07 | 2.24 | 1.59 | 2.65 | 3.73   | 2.04 | 2.19 |

**Table S6.** The maximum velocity point of flexion of finger joints after time normalization (0~50% for flexion) for 22 subjects.

| Position<br>(%) | Thumb |       | Index |       |       | Middle |       |       | Ring  |       |       | Little |       |       |
|-----------------|-------|-------|-------|-------|-------|--------|-------|-------|-------|-------|-------|--------|-------|-------|
|                 | IP    | MCP   | DIP   | PIP   | MCP   | DIP    | PIP   | MCP   | DIP   | PIP   | MCP   | DIP    | PIP   | MCP   |
| S1              | 25    | 23    | 26    | 13    | 20    | 31     | 14    | 20    | 31    | 11    | 23    | 24     | 15    | 25    |
| S2              | 26    | 16    | 12    | 13    | 23    | 36     | 15    | 23    | 32    | 15    | 26    | 18     | 16    | 30    |
| S3              | 28    | 24    | 15    | 16    | 27    | 18     | 16    | 22    | 17    | 16    | 26    | 20     | 19    | 28    |
| S4              | 31    | 31    | 21    | 22    | 33    | 19     | 20    | 32    | 19    | 20    | 32    | 19     | 18    | 33    |
| S5              | 23    | 26    | 30    | 16    | 25    | 16     | 15    | 25    | 16    | 13    | 24    | 21     | 13    | 25    |
| S6              | 33    | 34    | 26    | 25    | 32    | 25     | 20    | 26    | 22    | 20    | 30    | 24     | 20    | 34    |
| S7              | 26    | 25    | 35    | 15    | 23    | 25     | 19    | 24    | 21    | 19    | 23    | 30     | 20    | 22    |
| S8              | 29    | 20    | 23    | 17    | 27    | 27     | 21    | 28    | 23    | 17    | 30    | 24     | 19    | 27    |
| S9              | 24    | 18    | 23    | 15    | 25    | 18     | 17    | 27    | 18    | 17    | 28    | 19     | 17    | 32    |
| S10             | 23    | 18    | 30    | 26    | 31    | 36     | 20    | 28    | 21    | 19    | 28    | 35     | 20    | 33    |
| S11             | 21    | 27    | 31    | 19    | 26    | 30     | 15    | 22    | 28    | 20    | 24    | 22     | 15    | 24    |
| S12             | 28    | 29    | 27    | 24    | 16    | 24     | 21    | 30    | 24    | 22    | 32    | 27     | 24    | 34    |
| S13             | 30    | 26    | 37    | 17    | 25    | 35     | 18    | 25    | 20    | 16    | 25    | 21     | 15    | 27    |
| S14             | 28    | 20    | 30    | 18    | 25    | 31     | 18    | 25    | 32    | 19    | 28    | 26     | 20    | 28    |
| S15             | 28    | 18    | 20    | 14    | 21    | 18     | 13    | 19    | 19    | 18    | 26    | 21     | 19    | 29    |
| S16             | 32    | 36    | 34    | 35    | 25    | 23     | 32    | 24    | 16    | 23    | 30    | 37     | 22    | 30    |
| S17             | 33    | 23    | 23    | 20    | 29    | 18     | 18    | 31    | 18    | 19    | 29    | 20     | 18    | 32    |
| S18             | 33    | 32    | 23    | 19    | 31    | 18     | 16    | 29    | 21    | 18    | 30    | 22     | 19    | 30    |
| S19             | 21    | 27    | 17    | 16    | 20    | 19     | 17    | 20    | 29    | 16    | 21    | 22     | 17    | 24    |
| S20             | 37    | 29    | 32    | 20    | 15    | 29     | 18    | 18    | 30    | 20    | 31    | 38     | 18    | 34    |
| S21             | 26    | 27    | 26    | 22    | 29    | 24     | 19    | 28    | 28    | 24    | 31    | 25     | 23    | 31    |
| S22             | 33    | 18    | 18    | 16    | 30    | 17     | 15    | 29    | 17    | 15    | 32    | 19     | 16    | 30    |
| Mean            | 28.09 | 24.86 | 25.41 | 19.00 | 25.36 | 24.41  | 18.05 | 25.23 | 22.82 | 18.05 | 27.68 | 24.27  | 18.32 | 29.18 |
| SD              | 4.34  | 5.64  | 6.65  | 5.16  | 4.89  | 6.62   | 3.87  | 3.98  | 5.50  | 3.11  | 3.33  | 5.84   | 2.73  | 3.61  |

**Table S7.** The completion point of flexion of finger joints after time normalization (0~50% for flexion) for 22 subjects.

| Position<br>(%) | Thumb |       | Index |       |       | Middle |       |       | Ring  |       |       | Little |       |       |
|-----------------|-------|-------|-------|-------|-------|--------|-------|-------|-------|-------|-------|--------|-------|-------|
|                 | IP    | MCP   | DIP   | PIP   | MCP   | DIP    | PIP   | MCP   | DIP   | PIP   | MCP   | DIP    | PIP   | MCP   |
| S1              | 31    | 44    | 45    | 39    | 32    | 43     | 32    | 37    | 43    | 33    | 36    | 41     | 35    | 38    |
| S2              | 45    | 45    | 44    | 28    | 43    | 45     | 30    | 43    | 45    | 30    | 41    | 46     | 28    | 42    |
| S3              | 44    | 41    | 41    | 39    | 40    | 43     | 38    | 38    | 43    | 26    | 38    | 42     | 32    | 40    |
| S4              | 44    | 47    | 36    | 41    | 43    | 42     | 38    | 45    | 28    | 33    | 44    | 30     | 30    | 43    |
| S5              | 34    | 46    | 44    | 32    | 40    | 42     | 26    | 40    | 42    | 24    | 38    | 44     | 24    | 38    |
| S6              | 45    | 46    | 44    | 35    | 43    | 46     | 31    | 41    | 44    | 30    | 42    | 44     | 31    | 44    |
| S7              | 44    | 40    | 44    | 39    | 39    | 41     | 37    | 42    | 41    | 36    | 42    | 43     | 35    | 44    |
| S8              | 46    | 45    | 46    | 35    | 39    | 45     | 36    | 43    | 39    | 34    | 44    | 46     | 30    | 43    |
| S9              | 41    | 45    | 46    | 40    | 40    | 40     | 27    | 43    | 44    | 27    | 40    | 43     | 28    | 40    |
| S10             | 47    | 34    | 46    | 41    | 39    | 46     | 41    | 40    | 42    | 38    | 39    | 45     | 42    | 40    |
| S11             | 38    | 44    | 46    | 39    | 40    | 43     | 37    | 36    | 44    | 37    | 35    | 44     | 37    | 36    |
| S12             | 41    | 42    | 45    | 39    | 41    | 45     | 40    | 39    | 42    | 29    | 42    | 43     | 32    | 40    |
| S13             | 47    | 40    | 46    | 36    | 39    | 45     | 35    | 41    | 47    | 33    | 40    | 46     | 36    | 41    |
| S14             | 43    | 45    | 45    | 37    | 38    | 43     | 33    | 40    | 43    | 29    | 41    | 38     | 32    | 40    |
| S15             | 40    | 46    | 44    | 35    | 40    | 45     | 37    | 40    | 46    | 29    | 42    | 42     | 29    | 41    |
| S16             | 44    | 46    | 45    | 45    | 37    | 43     | 45    | 35    | 40    | 44    | 41    | 47     | 42    | 40    |
| S17             | 45    | 44    | 37    | 45    | 39    | 42     | 40    | 42    | 34    | 39    | 45    | 42     | 38    | 44    |
| S18             | 44    | 46    | 44    | 41    | 42    | 44     | 29    | 42    | 32    | 31    | 44    | 43     | 33    | 45    |
| S19             | 36    | 42    | 44    | 36    | 41    | 44     | 28    | 40    | 45    | 25    | 38    | 39     | 29    | 42    |
| S20             | 46    | 45    | 42    | 41    | 45    | 46     | 37    | 43    | 47    | 40    | 42    | 48     | 38    | 44    |
| S21             | 46    | 46    | 46    | 35    | 44    | 44     | 30    | 43    | 44    | 31    | 43    | 46     | 36    | 42    |
| S22             | 44    | 45    | 46    | 44    | 41    | 42     | 31    | 44    | 45    | 28    | 43    | 45     | 30    | 40    |
| Mean            | 42.50 | 43.82 | 43.91 | 38.27 | 40.23 | 43.59  | 34.45 | 40.77 | 41.82 | 32.09 | 40.91 | 43.05  | 33.05 | 41.23 |
| SD              | 4.30  | 2.99  | 2.74  | 4.13  | 2.72  | 1.68   | 5.07  | 2.60  | 4.81  | 5.20  | 2.67  | 3.81   | 4.63  | 2.31  |

**Table S8.** The initiation point of extension of finger joints after time normalization (50~100% for extension) for 22 subjects.

| Position<br>(%) | Thumb |       | Index |       |       | Middle |       |       | Ring  |       |       | Little |       |       |
|-----------------|-------|-------|-------|-------|-------|--------|-------|-------|-------|-------|-------|--------|-------|-------|
|                 | IP    | MCP   | DIP   | PIP   | MCP   | DIP    | PIP   | MCP   | DIP   | PIP   | MCP   | DIP    | PIP   | MCP   |
| S1              | 59    | 53    | 52    | 65    | 64    | 54     | 76    | 60    | 55    | 75    | 57    | 53     | 74    | 58    |
| S2              | 53    | 53    | 56    | 70    | 56    | 60     | 71    | 56    | 57    | 68    | 57    | 61     | 68    | 58    |
| S3              | 58    | 54    | 58    | 57    | 59    | 54     | 62    | 66    | 54    | 68    | 61    | 55     | 65    | 55    |
| S4              | 55    | 53    | 60    | 59    | 56    | 55     | 63    | 60    | 58    | 58    | 57    | 64     | 59    | 60    |
| S5              | 54    | 53    | 56    | 65    | 58    | 55     | 69    | 60    | 62    | 68    | 56    | 54     | 70    | 57    |
| S6              | 54    | 54    | 56    | 65    | 56    | 55     | 67    | 58    | 55    | 67    | 56    | 57     | 67    | 55    |
| S7              | 59    | 51    | 53    | 57    | 56    | 53     | 64    | 58    | 58    | 60    | 54    | 59     | 60    | 54    |
| S8              | 54    | 51    | 53    | 60    | 55    | 53     | 66    | 60    | 58    | 60    | 53    | 53     | 60    | 54    |
| S9              | 55    | 54    | 53    | 59    | 58    | 56     | 69    | 57    | 54    | 72    | 58    | 54     | 70    | 59    |
| S10             | 51    | 53    | 51    | 58    | 57    | 53     | 63    | 59    | 57    | 61    | 53    | 58     | 59    | 54    |
| S11             | 56    | 53    | 54    | 61    | 58    | 57     | 64    | 57    | 54    | 69    | 60    | 69     | 67    | 55    |
| S12             | 61    | 54    | 57    | 66    | 56    | 56     | 69    | 57    | 55    | 67    | 56    | 55     | 66    | 57    |
| S13             | 51    | 53    | 52    | 59    | 56    | 53     | 66    | 59    | 53    | 62    | 54    | 63     | 59    | 53    |
| S14             | 56    | 54    | 53    | 60    | 57    | 53     | 70    | 60    | 57    | 65    | 54    | 56     | 63    | 55    |
| S15             | 54    | 54    | 53    | 62    | 57    | 54     | 65    | 61    | 53    | 65    | 57    | 58     | 64    | 56    |
| S16             | 56    | 51    | 53    | 53    | 58    | 58     | 53    | 60    | 58    | 54    | 57    | 60     | 56    | 56    |
| S17             | 55    | 54    | 52    | 58    | 60    | 55     | 63    | 61    | 64    | 60    | 58    | 58     | 63    | 57    |
| S18             | 53    | 55    | 54    | 60    | 58    | 57     | 68    | 58    | 64    | 67    | 55    | 61     | 63    | 56    |
| S19             | 55    | 54    | 56    | 58    | 57    | 53     | 65    | 58    | 53    | 66    | 59    | 52     | 63    | 58    |
| S20             | 52    | 52    | 55    | 56    | 53    | 53     | 57    | 53    | 53    | 58    | 54    | 54     | 61    | 53    |
| S21             | 55    | 51    | 54    | 66    | 57    | 54     | 66    | 56    | 55    | 67    | 57    | 53     | 64    | 59    |
| S22             | 54    | 57    | 57    | 58    | 63    | 54     | 64    | 59    | 55    | 59    | 56    | 55     | 59    | 56    |
| Mean            | 55.00 | 53.23 | 54.45 | 60.55 | 57.50 | 54.77  | 65.45 | 58.77 | 56.45 | 64.36 | 56.32 | 57.36  | 63.64 | 56.14 |
| SD              | 2.53  | 1.45  | 2.28  | 4.07  | 2.43  | 1.90   | 4.75  | 2.51  | 3.32  | 5.14  | 2.15  | 4.29   | 4.46  | 1.98  |



**Table S9.** The maximum velocity point of extension of finger joints after time normalization (50~100% for extension) for 22 subjects.

| Position<br>(%) | Thumb |       | Index |       |       | Middle |       |       | Ring  |       |       | Little |       |       |
|-----------------|-------|-------|-------|-------|-------|--------|-------|-------|-------|-------|-------|--------|-------|-------|
|                 | IP    | MCP   | DIP   | PIP   | MCP   | DIP    | PIP   | MCP   | DIP   | PIP   | MCP   | DIP    | PIP   | MCP   |
| S1              | 73    | 85    | 83    | 88    | 81    | 71     | 88    | 79    | 69    | 88    | 78    | 81     | 90    | 78    |
| S2              | 71    | 82    | 77    | 86    | 83    | 73     | 86    | 82    | 71    | 84    | 73    | 84     | 88    | 74    |
| S3              | 74    | 78    | 75    | 76    | 75    | 73     | 82    | 76    | 78    | 78    | 77    | 78     | 80    | 75    |
| S4              | 71    | 67    | 81    | 82    | 80    | 83     | 82    | 81    | 84    | 75    | 82    | 82     | 83    | 80    |
| S5              | 72    | 84    | 75    | 81    | 80    | 75     | 84    | 83    | 72    | 85    | 80    | 82     | 88    | 78    |
| S6              | 70    | 65    | 75    | 82    | 71    | 76     | 82    | 78    | 76    | 82    | 70    | 77     | 85    | 69    |
| S7              | 74    | 81    | 67    | 74    | 73    | 75     | 76    | 76    | 71    | 72    | 69    | 66     | 77    | 67    |
| S8              | 69    | 55    | 66    | 77    | 72    | 73     | 77    | 76    | 70    | 72    | 67    | 67     | 74    | 69    |
| S9              | 78    | 65    | 71    | 77    | 78    | 77     | 79    | 80    | 79    | 81    | 82    | 75     | 83    | 82    |
| S10             | 61    | 74    | 67    | 71    | 70    | 67     | 75    | 73    | 75    | 74    | 72    | 66     | 76    | 71    |
| S11             | 67    | 78    | 81    | 82    | 79    | 78     | 79    | 80    | 80    | 81    | 82    | 75     | 81    | 82    |
| S12             | 71    | 79    | 76    | 79    | 70    | 79     | 80    | 73    | 74    | 76    | 75    | 75     | 77    | 80    |
| S13             | 58    | 62    | 62    | 70    | 67    | 62     | 76    | 73    | 72    | 75    | 68    | 70     | 78    | 67    |
| S14             | 71    | 74    | 69    | 75    | 82    | 77     | 80    | 78    | 64    | 77    | 71    | 70     | 81    | 71    |
| S15             | 78    | 77    | 74    | 75    | 77    | 74     | 78    | 79    | 76    | 80    | 81    | 73     | 75    | 79    |
| S16             | 77    | 61    | 73    | 69    | 75    | 77     | 73    | 78    | 70    | 81    | 73    | 75     | 77    | 73    |
| S17             | 76    | 70    | 75    | 82    | 82    | 81     | 81    | 84    | 81    | 82    | 82    | 79     | 86    | 85    |
| S18             | 68    | 82    | 79    | 81    | 78    | 79     | 84    | 78    | 81    | 82    | 80    | 80     | 82    | 73    |
| S19             | 68    | 67    | 69    | 71    | 72    | 73     | 78    | 75    | 76    | 75    | 74    | 74     | 77    | 75    |
| S20             | 60    | 67    | 64    | 68    | 65    | 65     | 67    | 65    | 65    | 70    | 64    | 64     | 74    | 65    |
| S21             | 78    | 67    | 67    | 80    | 72    | 64     | 78    | 79    | 76    | 80    | 82    | 71     | 79    | 80    |
| S22             | 67    | 73    | 70    | 74    | 75    | 75     | 76    | 78    | 66    | 75    | 68    | 76     | 77    | 74    |
| Mean            | 70.55 | 72.41 | 72.55 | 77.27 | 75.32 | 73.95  | 79.14 | 77.45 | 73.91 | 78.41 | 75.00 | 74.55  | 80.36 | 74.86 |
| SD              | 5.65  | 8.33  | 5.80  | 5.51  | 5.09  | 5.42   | 4.59  | 4.11  | 5.43  | 4.67  | 5.86  | 5.70   | 4.75  | 5.56  |

**Table S10.** The completion point of extension of finger joints after time normalization (50~100% for extension) for 22 subjects.

| Position<br>(%) | Thumb |       | Index |       |       | Middle |       |       | Ring |       |       | Little |       |       |
|-----------------|-------|-------|-------|-------|-------|--------|-------|-------|------|-------|-------|--------|-------|-------|
|                 | IP    | MCP   | DIP   | PIP   | MCP   | DIP    | PIP   | MCP   | DIP  | PIP   | MCP   | DIP    | PIP   | MCP   |
| S1              | 95    | 96    | 96    | 99    | 95    | 94     | 99    | 97    | 93   | 98    | 97    | 94     | 99    | 90    |
| S2              | 96    | 98    | 94    | 97    | 94    | 96     | 98    | 93    | 96   | 99    | 92    | 95     | 98    | 93    |
| S3              | 88    | 95    | 86    | 91    | 94    | 82     | 89    | 95    | 91   | 93    | 91    | 85     | 91    | 95    |
| S4              | 90    | 96    | 95    | 97    | 95    | 96     | 97    | 93    | 96   | 96    | 96    | 95     | 96    | 94    |
| S5              | 89    | 98    | 88    | 95    | 94    | 91     | 96    | 92    | 90   | 97    | 93    | 94     | 97    | 89    |
| S6              | 95    | 94    | 89    | 94    | 87    | 88     | 93    | 91    | 89   | 93    | 90    | 86     | 94    | 89    |
| S7              | 92    | 96    | 82    | 90    | 91    | 90     | 92    | 92    | 92   | 92    | 83    | 92     | 93    | 81    |
| S8              | 94    | 95    | 85    | 93    | 83    | 85     | 94    | 87    | 88   | 93    | 84    | 88     | 93    | 81    |
| S9              | 90    | 94    | 80    | 91    | 89    | 87     | 95    | 89    | 88   | 94    | 92    | 88     | 94    | 91    |
| S10             | 91    | 97    | 83    | 92    | 84    | 79     | 93    | 87    | 92   | 92    | 89    | 90     | 92    | 79    |
| S11             | 92    | 96    | 89    | 97    | 90    | 95     | 96    | 91    | 90   | 94    | 92    | 90     | 92    | 91    |
| S12             | 90    | 94    | 85    | 90    | 92    | 86     | 94    | 90    | 86   | 88    | 94    | 82     | 85    | 93    |
| S13             | 96    | 88    | 84    | 91    | 90    | 86     | 92    | 92    | 87   | 91    | 88    | 80     | 91    | 85    |
| S14             | 92    | 95    | 78    | 90    | 92    | 91     | 93    | 92    | 91   | 91    | 86    | 92     | 92    | 88    |
| S15             | 89    | 94    | 85    | 90    | 88    | 82     | 89    | 91    | 85   | 90    | 91    | 83     | 84    | 92    |
| S16             | 97    | 95    | 91    | 92    | 93    | 91     | 90    | 90    | 89   | 93    | 93    | 90     | 94    | 90    |
| S17             | 93    | 93    | 90    | 95    | 93    | 94     | 97    | 95    | 93   | 94    | 94    | 97     | 97    | 93    |
| S18             | 93    | 98    | 87    | 97    | 91    | 89     | 95    | 92    | 92   | 94    | 93    | 85     | 93    | 91    |
| S19             | 86    | 93    | 74    | 86    | 92    | 88     | 90    | 92    | 82   | 84    | 94    | 79     | 89    | 92    |
| S20             | 95    | 94    | 78    | 90    | 92    | 86     | 92    | 90    | 89   | 92    | 93    | 81     | 93    | 92    |
| S21             | 97    | 92    | 86    | 92    | 92    | 88     | 92    | 89    | 88   | 92    | 92    | 83     | 89    | 93    |
| S22             | 88    | 95    | 81    | 90    | 92    | 80     | 90    | 92    | 82   | 90    | 93    | 87     | 90    | 92    |
| Mean            | 92.18 | 94.82 | 85.73 | 92.68 | 91.05 | 88.36  | 93.45 | 91.45 | 89.5 | 92.73 | 91.36 | 88.00  | 92.55 | 89.73 |
| SD              | 3.19  | 2.24  | 5.66  | 3.27  | 3.21  | 4.96   | 2.92  | 2.40  | 3.73 | 3.27  | 3.53  | 5.34   | 3.76  | 4.41  |

**Table S11.** The initiation point and completion point of flexion of fingers after time normalization (0~50% for flexion) for 22 subjects.

| Position<br>(%) | Initiation point |       |        |      |        | Completion point |       |        |       |        |
|-----------------|------------------|-------|--------|------|--------|------------------|-------|--------|-------|--------|
|                 | Thumb            | Index | Middle | Ring | Little | Thumb            | Index | Middle | Ring  | Little |
| S1              | 5                | 2     | 2      | 1    | 3      | 44               | 45    | 43     | 43    | 41     |
| S2              | 2                | 1     | 2      | 3    | 4      | 45               | 44    | 45     | 45    | 46     |
| S3              | 5                | 4     | 5      | 4    | 5      | 44               | 41    | 43     | 43    | 42     |
| S4              | 3                | 3     | 3      | 4    | 3      | 47               | 43    | 45     | 44    | 43     |
| S5              | 3                | 5     | 4      | 4    | 4      | 46               | 44    | 42     | 42    | 44     |
| S6              | 3                | 4     | 4      | 4    | 6      | 46               | 44    | 46     | 44    | 44     |
| S7              | 2                | 4     | 6      | 5    | 5      | 44               | 44    | 42     | 42    | 44     |
| S8              | 1                | 3     | 4      | 3    | 4      | 46               | 46    | 45     | 44    | 46     |
| S9              | 5                | 5     | 6      | 6    | 6      | 45               | 46    | 43     | 44    | 43     |
| S10             | 3                | 8     | 6      | 5    | 8      | 47               | 46    | 46     | 42    | 45     |
| S11             | 4                | 5     | 5      | 6    | 5      | 44               | 46    | 43     | 44    | 44     |
| S12             | 5                | 4     | 5      | 7    | 5      | 42               | 45    | 45     | 42    | 43     |
| S13             | 1                | 4     | 4      | 4    | 3      | 47               | 46    | 45     | 47    | 46     |
| S14             | 4                | 4     | 5      | 4    | 6      | 45               | 45    | 43     | 43    | 40     |
| S15             | 4                | 3     | 5      | 5    | 6      | 46               | 44    | 45     | 46    | 42     |
| S16             | 1                | 4     | 4      | 4    | 5      | 46               | 45    | 45     | 44    | 47     |
| S17             | 5                | 2     | 2      | 3    | 4      | 45               | 45    | 42     | 45    | 44     |
| S18             | 3                | 6     | 5      | 6    | 7      | 46               | 44    | 44     | 44    | 45     |
| S19             | 3                | 4     | 4      | 4    | 4      | 42               | 44    | 44     | 45    | 42     |
| S20             | 2                | 6     | 4      | 6    | 5      | 46               | 45    | 46     | 47    | 48     |
| S21             | 2                | 4     | 4      | 5    | 6      | 46               | 46    | 44     | 44    | 46     |
| S22             | 2                | 5     | 3      | 4    | 5      | 45               | 46    | 44     | 45    | 45     |
| Mean            | 3.09             | 4.09  | 4.18   | 4.41 | 4.95   | 45.18            | 44.73 | 44.09  | 44.05 | 44.09  |
| SD              | 1.38             | 1.51  | 1.22   | 1.33 | 1.29   | 1.40             | 1.24  | 1.31   | 1.46  | 2.00   |

**Table S12.** The initiation point and completion point of extension of fingers after time normalization (50~100% for extension) for 22 subjects.

| Position<br>(%) | Initiation point |       |        |       |        | Completion point |       |        |       |        |
|-----------------|------------------|-------|--------|-------|--------|------------------|-------|--------|-------|--------|
|                 | Thumb            | Index | Middle | Ring  | Little | Thumb            | Index | Middle | Ring  | Little |
| S1              | 53               | 52    | 54     | 55    | 53     | 96               | 99    | 99     | 98    | 99     |
| S2              | 53               | 56    | 56     | 57    | 58     | 98               | 97    | 98     | 99    | 98     |
| S3              | 54               | 57    | 54     | 54    | 55     | 95               | 94    | 95     | 93    | 95     |
| S4              | 53               | 56    | 55     | 57    | 59     | 96               | 97    | 97     | 96    | 96     |
| S5              | 53               | 56    | 55     | 56    | 54     | 98               | 95    | 96     | 97    | 97     |
| S6              | 54               | 56    | 55     | 55    | 55     | 95               | 94    | 93     | 93    | 94     |
| S7              | 51               | 53    | 53     | 54    | 54     | 96               | 91    | 92     | 92    | 93     |
| S8              | 51               | 53    | 53     | 53    | 53     | 95               | 93    | 94     | 93    | 93     |
| S9              | 54               | 53    | 56     | 54    | 54     | 94               | 91    | 95     | 94    | 94     |
| S10             | 51               | 51    | 53     | 53    | 54     | 97               | 92    | 93     | 92    | 92     |
| S11             | 53               | 54    | 57     | 54    | 55     | 96               | 97    | 96     | 94    | 92     |
| S12             | 54               | 56    | 56     | 55    | 55     | 94               | 92    | 94     | 94    | 93     |
| S13             | 51               | 52    | 53     | 53    | 53     | 96               | 91    | 92     | 91    | 91     |
| S14             | 54               | 53    | 53     | 54    | 55     | 95               | 92    | 93     | 91    | 92     |
| S15             | 54               | 53    | 54     | 53    | 56     | 94               | 90    | 91     | 91    | 92     |
| S16             | 51               | 53    | 53     | 54    | 56     | 97               | 93    | 91     | 93    | 94     |
| S17             | 54               | 52    | 55     | 58    | 57     | 93               | 95    | 97     | 94    | 97     |
| S18             | 53               | 54    | 57     | 55    | 56     | 98               | 97    | 95     | 94    | 93     |
| S19             | 54               | 56    | 53     | 53    | 52     | 93               | 92    | 92     | 94    | 92     |
| S20             | 52               | 53    | 53     | 53    | 53     | 95               | 92    | 92     | 93    | 93     |
| S21             | 51               | 54    | 54     | 55    | 53     | 97               | 92    | 92     | 92    | 93     |
| S22             | 54               | 57    | 54     | 55    | 55     | 95               | 92    | 92     | 93    | 92     |
| Mean            | 52.82            | 54.09 | 54.36  | 54.55 | 54.77  | 95.59            | 93.55 | 94.05  | 93.68 | 93.86  |
| SD              | 1.26             | 1.82  | 1.36   | 1.44  | 1.74   | 1.50             | 2.50  | 2.34   | 2.15  | 2.21   |
